# Supplementary material for: RELA∙8-Oxoguanine DNA Glycosylase1 Is an Epigenetic Regulatory Complex Coordinating the Hexosamine Biosynthetic Pathway in RSV Infection
Source: MDPI journal article supplement (doi:10.3390/cells11142210), 2022-07-15

Supplementary Figure S1: Overlap of N glycosylated peptides in two models of RELA knockdown

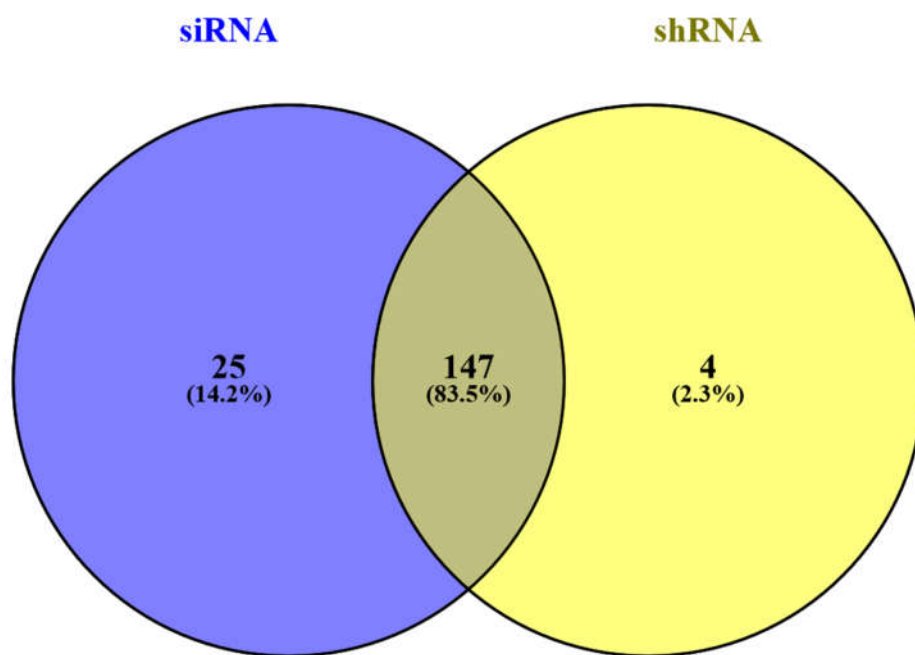

Supplementary Figure S2: Gating strategy for GFPT2 flow cytometry

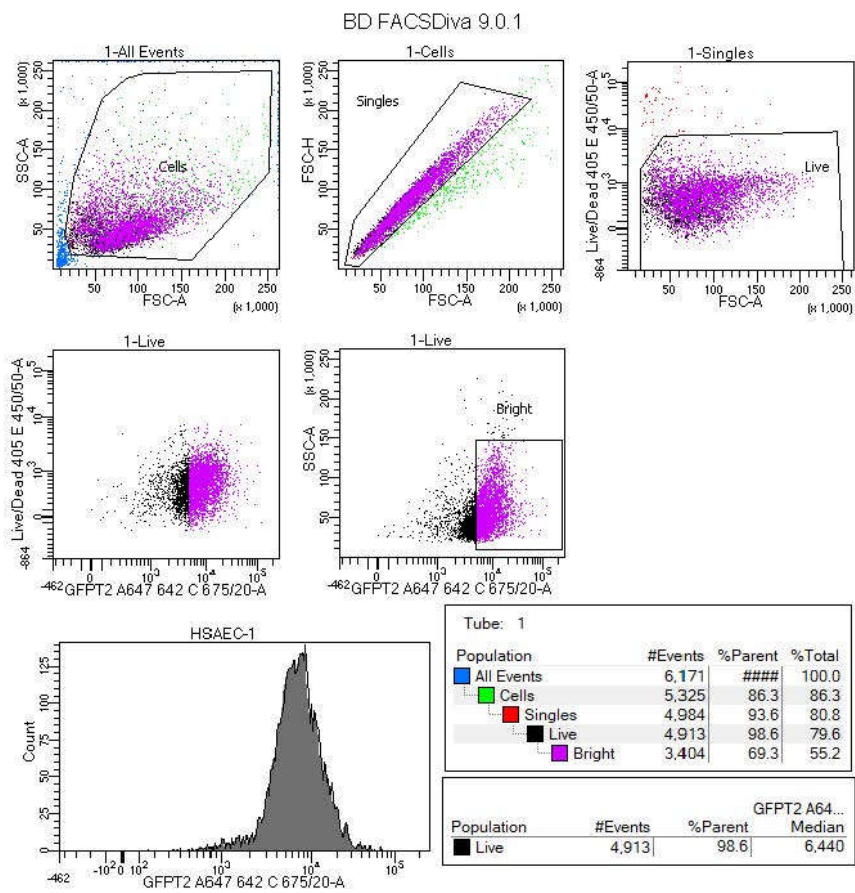

Supplement: s1 [file s1]
